# Supplementary material
Source: Royal Society of Chemistry journal article supplement (doi:10.1039/d5dt02476e)
Supplement: d5dt02476e1.pdf [file d5dt02476e1.pdf]

## **Interaction of Copper(II) (3+2)N-Chelating Complexes with DNA and BSA: Hydrolytic DNA Cleavage and ROS-Mediated Apoptosis**

**Mariappan Murali,<sup>a\*</sup> Anbarasu Kanchana Mala,<sup>b</sup> Somasundaram Sangeetha<sup>a, c</sup>  
Balasubramaniam Selvakumaran,<sup>a</sup> Pitchan Arul Prakash,<sup>d</sup> Selvaraj Shanmugavadivel,<sup>a</sup>  
Tamilarasan Ajay Kamal,<sup>e</sup> Mohamed Sultan Mohamed Jaabir<sup>d</sup>**

<sup>a</sup>*Coordination and Bioinorganic Chemistry Research Laboratory, Department of Chemistry, National College (Autonomous), Tiruchirappalli 620 001 Tamil Nadu, India*

<sup>b</sup>*Department of Pharmacology, Saveetha Institute of Medical and Technical Sciences, Chennai 600 124 Tamil Nadu, India.*

<sup>c</sup>*Department of Chemistry, Tamilavel Umamaheswaranar Karanthai Arts College, Thanjavur 613 002, Tamil Nadu, India* <sup>d</sup>*Department of Biotechnology and Microbiology, National College (Autonomous), Tiruchirappalli 620 001, Tamil Nadu, India*

<sup>e</sup>*Center for Advanced Energy Materials, SRM TRP Engineering College, Tiruchirappalli - 621 105, Tamil Nadu, India; Centre for Research, Trichy SRM Medical College Hospital and Research Center, Tiruchirappalli, 621105,.*

\*Corresponding author: Mariappan Murali - e-mail: [murali@nct.ac.in](mailto:murali@nct.ac.in) and [ma66mu@gmail.com](mailto:ma66mu@gmail.com)

Phone: +91-431-2482995 / Fax: +91-431-2481997

**Table S1** Selected crystal data and structure refinement parameters for **2**

---

|                                                          |                                                                                  |
|----------------------------------------------------------|----------------------------------------------------------------------------------|
| Formula                                                  | C <sub>26</sub> H <sub>23</sub> Cl <sub>2</sub> N <sub>5</sub> O <sub>8</sub> Cu |
| Formula weight                                           | 667.93                                                                           |
| Temperature (K)                                          | 296(2)                                                                           |
| Wavelength (Å)                                           | 0.71073                                                                          |
| Crystal system                                           | Monoclinic                                                                       |
| Space group                                              | P2 <sub>1</sub> /c                                                               |
| <i>a</i> (Å)                                             | 16.2038(10)                                                                      |
| <i>b</i> (Å)                                             | 11.7856(8)                                                                       |
| <i>c</i> (Å)                                             | 15.4244(10)                                                                      |
| $\alpha$ (°)                                             | 90                                                                               |
| $\beta$ (°)                                              | 108.735(2)                                                                       |
| $\gamma$ (°)                                             | 90                                                                               |
| <i>V</i> (Å) <sup>3</sup> , <i>Z</i>                     | 2789.5(3), 4                                                                     |
| <i>D</i> <sub>calc</sub> (mg m <sup>-3</sup> )           | 1.590                                                                            |
| $\mu$ (mm <sup>-1</sup> )                                | 1.033                                                                            |
| <i>F</i> (000)                                           | 1364                                                                             |
| Crystal size (mm <sup>3</sup> )                          | 0.350 × 0.320 × 0.210                                                            |
| $\theta$ (°)                                             | 2.179 to 24.998                                                                  |
| Index ranges                                             | -19 ≤ <i>h</i> ≤ 19<br>-13 ≤ <i>k</i> ≤ 14<br>-18 ≤ <i>l</i> ≤ 16                |
| Reflections collected                                    | 19061                                                                            |
| Independent reflections                                  | 4879                                                                             |
| Reflections observed [ <i>I</i> > 2σ( <i>I</i> )]        | 4069                                                                             |
| <i>R</i> <sub>int</sub>                                  | 0.0300                                                                           |
| GOOF                                                     | 1.048                                                                            |
| <i>R</i> <sub>1</sub> [ <i>I</i> > 2σ( <i>I</i> )]       | 0.0397                                                                           |
| w <i>R</i> <sub>2</sub> [ <i>I</i> > 2σ( <i>I</i> )]     | 0.0994                                                                           |
| <i>R</i> <sub>1</sub> , w <i>R</i> <sub>2</sub> all data | 0.0507/0.1087                                                                    |

---

**Table S2** Ligand-based absorption spectral properties<sup>a</sup> and fluorescence spectral properties<sup>b</sup> of copper(II) complexes (**1** and **2**) bound to CT DNA

| Complex                               | Ligand-based             |    |                      |                         |                   |                                         |                                                      |
|---------------------------------------|--------------------------|----|----------------------|-------------------------|-------------------|-----------------------------------------|------------------------------------------------------|
|                                       | $\lambda_{\max}$<br>(nm) | R  | Change in absorbance | $\Delta\varepsilon$ (%) | Red-shift<br>(nm) | $K_b$ ( $\times 10^5$ M <sup>-1</sup> ) | $K_{\text{app}}^b$ ( $\times 10^6$ M <sup>-1</sup> ) |
| [Cu(L1)(phen)] <sup>2+</sup> <b>1</b> | 268                      | 25 | Hypochromism         | 60                      | 3                 | 1.355 $\pm$ 0.001                       | 5.2                                                  |
| [Cu(L2)(phen)] <sup>2+</sup> <b>2</b> | 268                      | 25 | Hypochromism         | 32                      | 2                 | 1.056 $\pm$ 0.001                       | 5.0                                                  |

<sup>a</sup>Measurements were made at R = 25, where R = [DNA]/[complex]; the concentration of solutions of Cu(II) complexes =  $10 \times 10^{-6}$  M (**1** and **2**). <sup>b</sup>Apparent DNA binding constant from the ethidium bromide displacement assay using increasing concentrations (0-10  $\mu$ M) of **1** and **2**.

**Table S3** Quenching, association, binding and thermodynamic parameters of the interaction of **1** and **2** with BSA at different temperatures

| Parameters                                                         | 300 K         | R      | 310 K          | R      |
|--------------------------------------------------------------------|---------------|--------|----------------|--------|
| <b>[Cu(L1)(phen)](ClO<sub>4</sub>)<sub>2</sub> <b>1</b></b>        |               |        |                |        |
| K <sub>SV</sub> (10 <sup>5</sup> M <sup>-1</sup> ) ± SD            | 4.306 ± 0.004 | 0.9991 | 5.427 ± 0.006  | 0.9985 |
| k <sub>q</sub> (10 <sup>13</sup> M <sup>-1</sup> s <sup>-1</sup> ) | 4.306         |        | 5.427          |        |
| K <sub>a</sub> (10 <sup>5</sup> M <sup>-1</sup> ) ± SD             | 1.501 ± 0.016 | 0.9967 | 2.2643 ± 0.010 | 0.9951 |
| K <sub>b</sub> (10 <sup>6</sup> M <sup>-1</sup> ) ± SD             | 1.102 ± 0.037 | 0.9959 | 1.341 ± 0.012  | 0.9991 |
| n ± SD                                                             | 1.101 ± 0.006 |        | 1.046 ± 0.004  |        |
| ΔH° (kJ mol <sup>-1</sup> )                                        | 70.426        |        |                |        |
| ΔS° (J mol <sup>-1</sup> K <sup>-1</sup> )                         | 105.293       |        | 106.138        |        |
| ΔG° (kJ mol <sup>-1</sup> )                                        | -31.954       |        | -32.619        |        |
| <b>[Cu(L2)(phen)](ClO<sub>4</sub>)<sub>2</sub> <b>2</b></b>        |               |        |                |        |
| K <sub>SV</sub> (10 <sup>5</sup> M <sup>-1</sup> ) ± SD            | 4.075 ± 0.004 | 0.9986 | 5.617 ± 0.006  | 0.9989 |
| k <sub>q</sub> (10 <sup>13</sup> M <sup>-1</sup> s <sup>-1</sup> ) | 4.075         |        | 5.617          |        |
| K <sub>a</sub> (10 <sup>5</sup> M <sup>-1</sup> ) ± SD             | 3.229 ± 0.006 | 0.9969 | 3.8804 ± 0.004 | 0.9975 |
| K <sub>b</sub> (10 <sup>6</sup> M <sup>-1</sup> ) ± SD             | 2.188 ± 0.012 | 0.9934 | 2.623 ± 0.015  | 0.9984 |
| n ± SD                                                             | 1.163 ± 0.002 |        | 1.142 ± 0.006  |        |
| ΔH° (kJ mol <sup>-1</sup> )                                        | 73.624        |        |                |        |
| ΔS° (J mol <sup>-1</sup> K <sup>-1</sup> )                         | 108.326       |        | 109.452        |        |
| ΔG° (kJ mol <sup>-1</sup> )                                        | -32.613       |        | -34.922        |        |

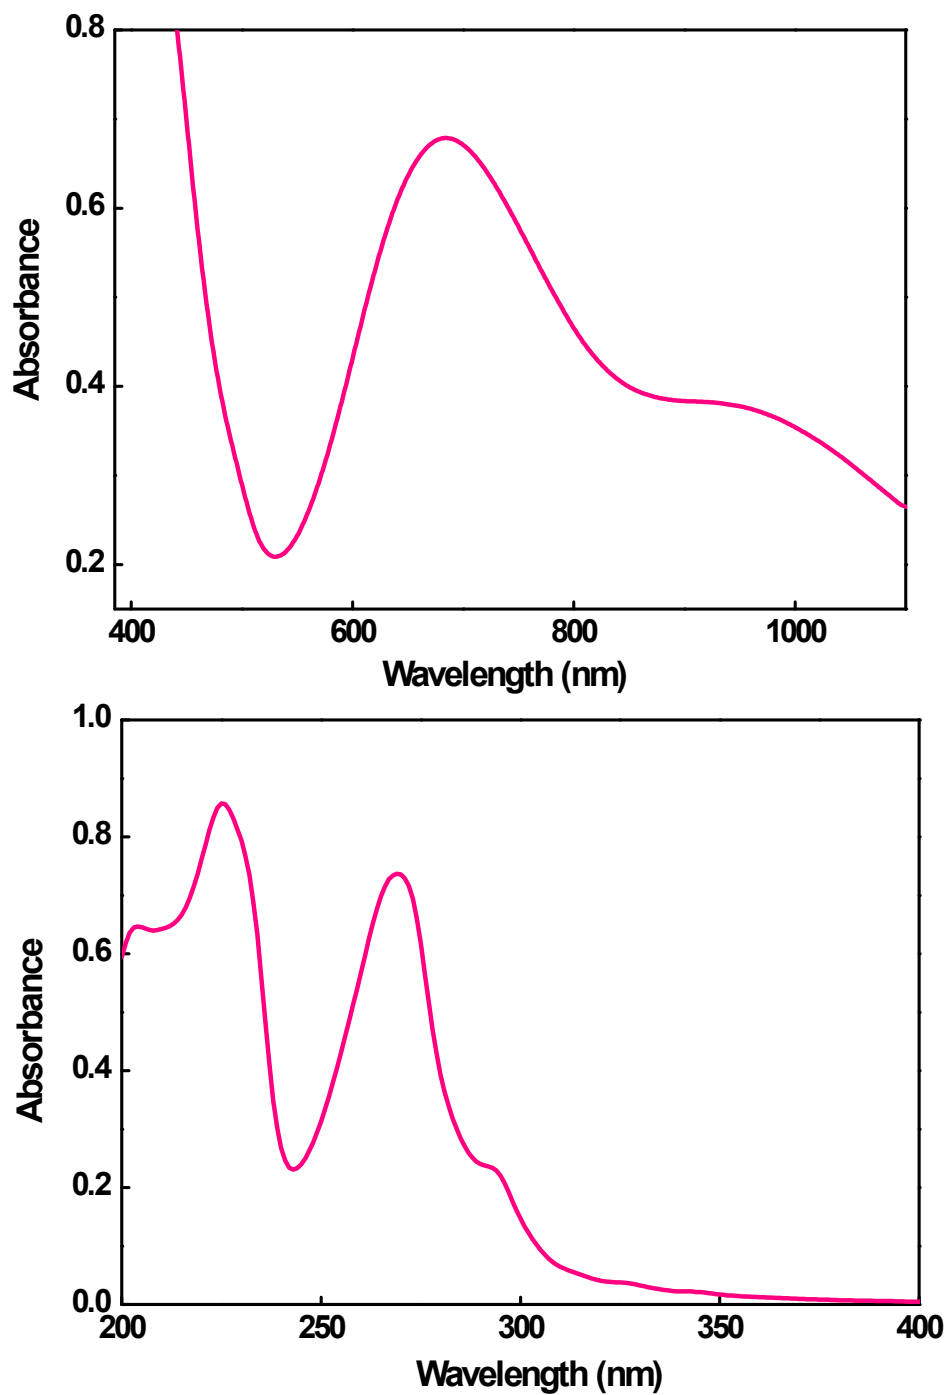

Fig. S1 Electronic spectra of [Cu(L1)(phen)](ClO<sub>4</sub>)<sub>2</sub> 1 in DMF

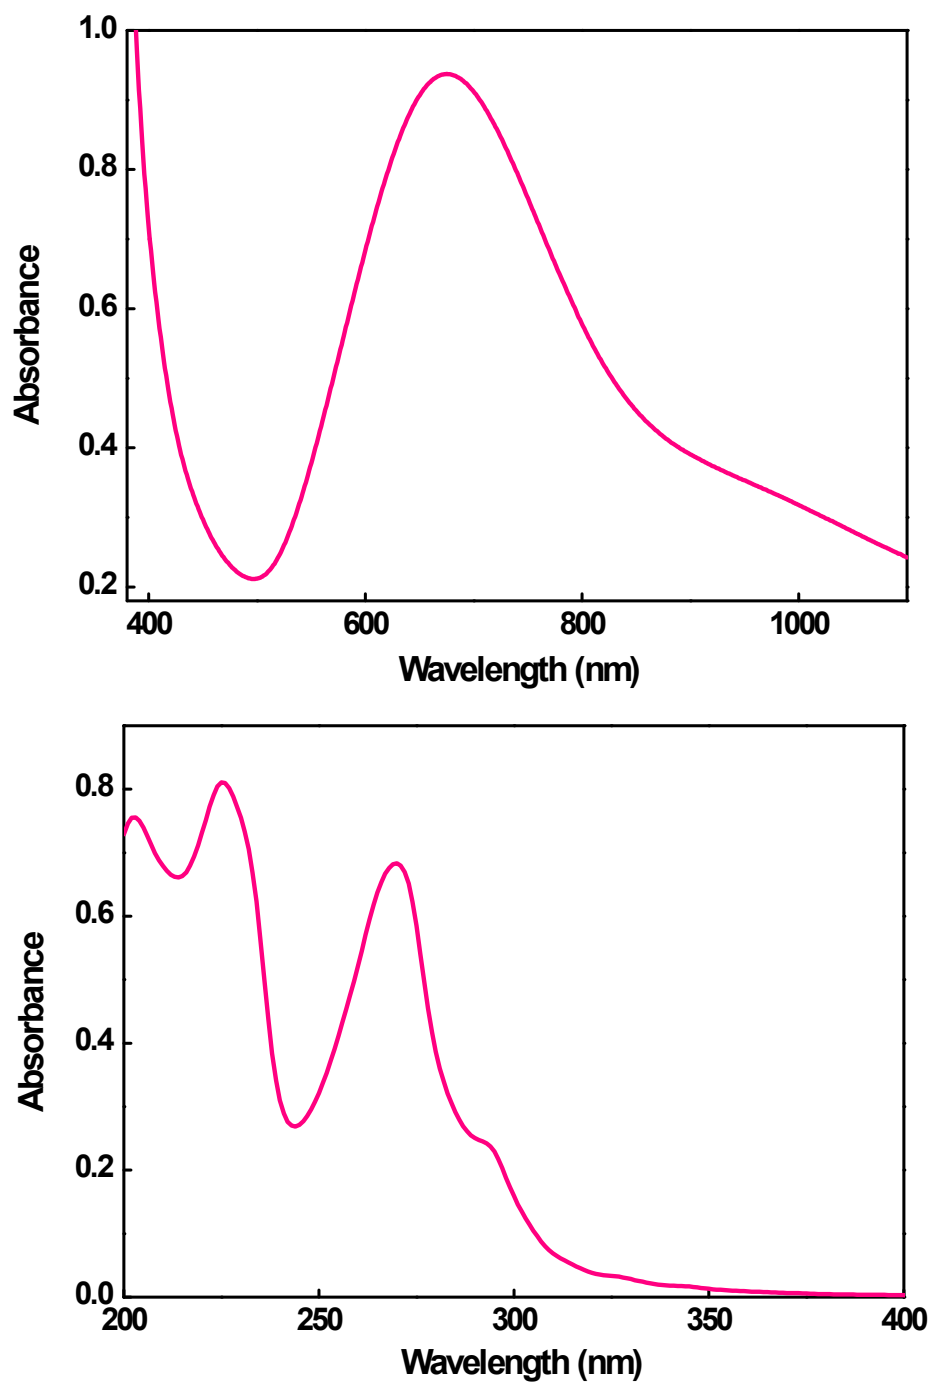

Fig. S2 Electronic spectra of  $[\text{Cu}(\text{L2})(\text{phen})](\text{ClO}_4)_2 \cdot 2$  in DMF

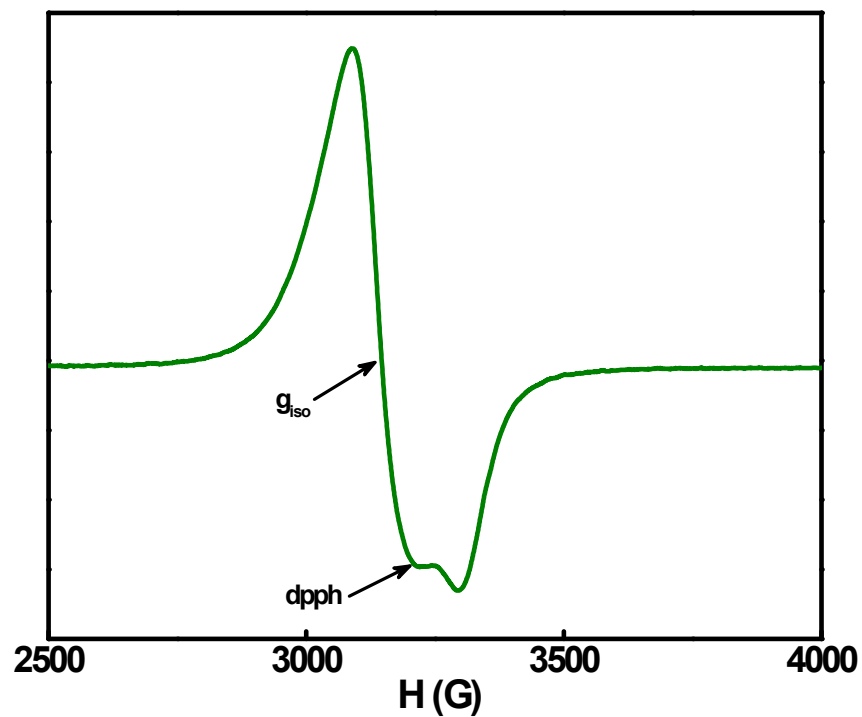

Fig. S3 Polycrystalline EPR spectrum of  $[\text{Cu}(\text{L1})(\text{phen})](\text{ClO}_4)_2$  **1** at RT.

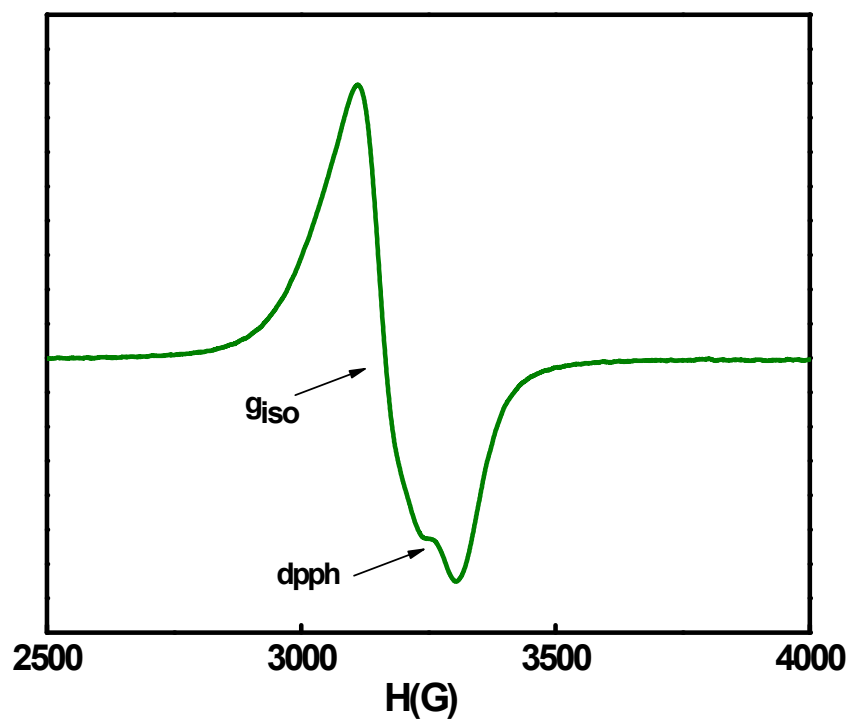

Fig. S4 Polycrystalline EPR spectrum of  $[\text{Cu}(\text{L2})(\text{phen})](\text{ClO}_4)_2$  **2** at RT.

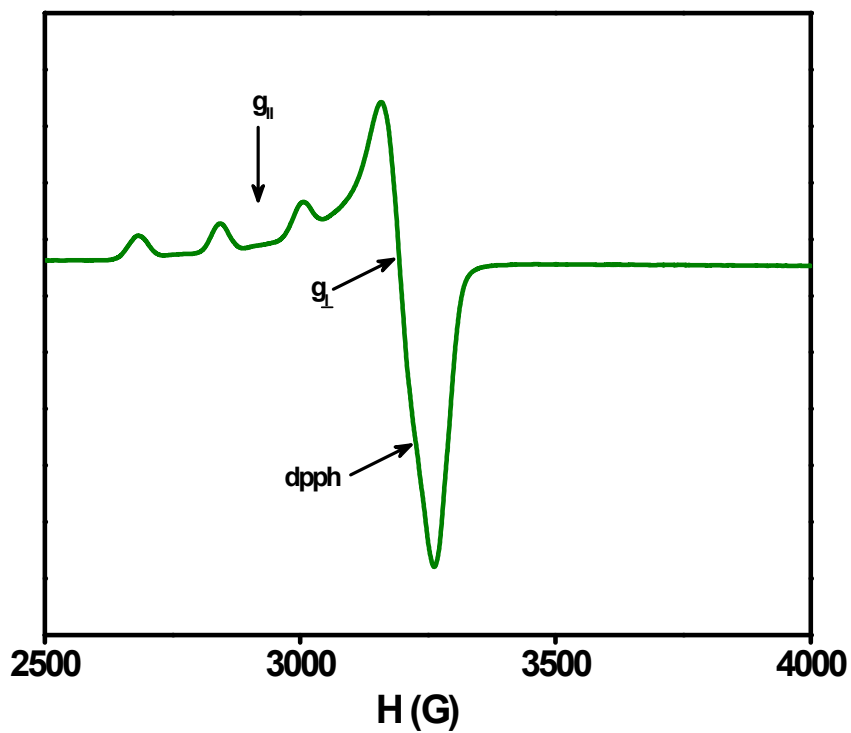

Fig. S5 EPR spectrum of  $[\text{Cu}(\text{L1})(\text{phen})](\text{ClO}_4)_2$  **1** in DMF at 77 K.

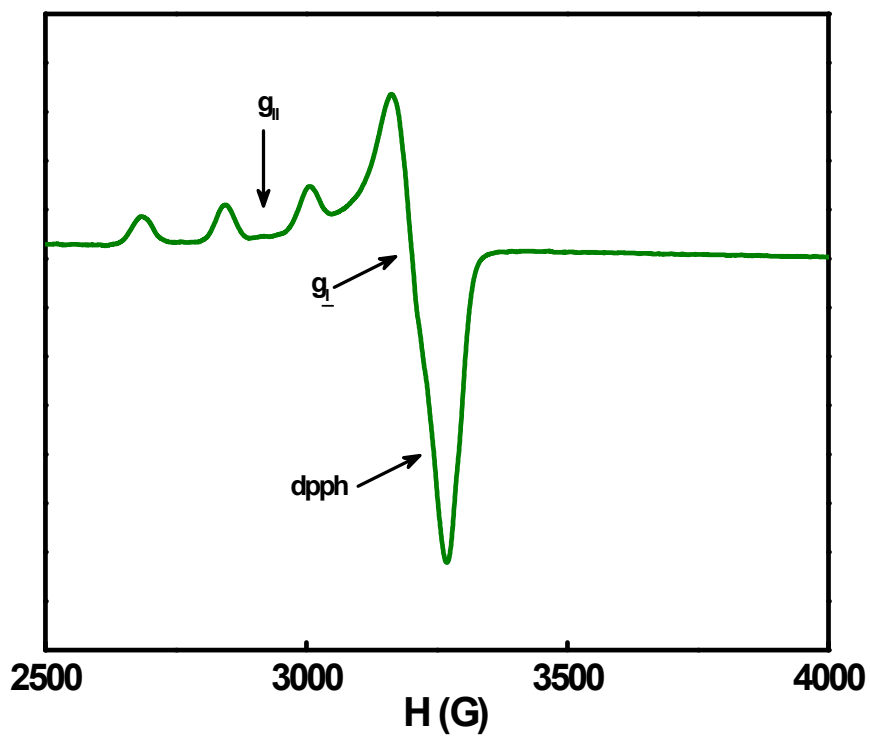

Fig. S6 EPR spectrum of  $[\text{Cu}(\text{L2})(\text{phen})](\text{ClO}_4)_2$  **2** in DMF at 77 K.

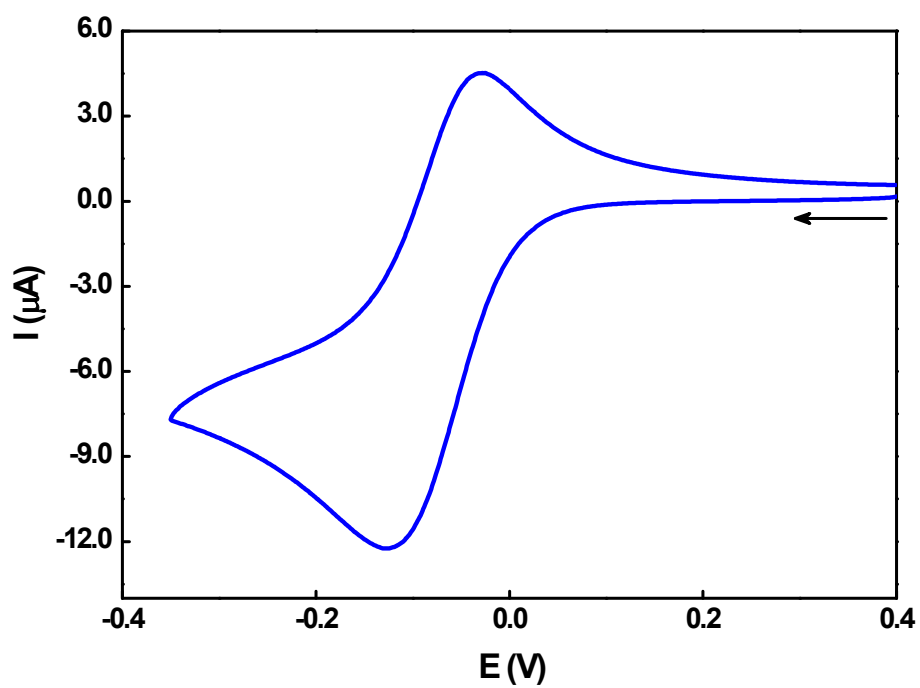

**Fig. S7** Cyclic voltammogram of  $[\text{Cu}(\text{L1})(\text{phen})](\text{ClO}_4)_2$  **1** at  $50 \text{ mV s}^{-1}$  scan rate in DMF

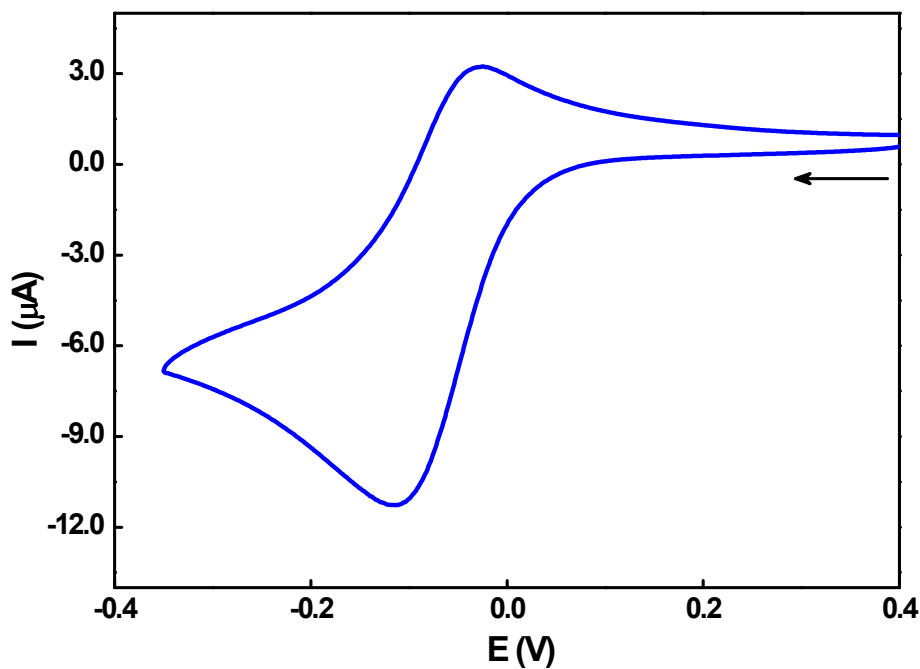

**Fig. S8** Cyclic voltammogram of  $[\text{Cu}(\text{L2})(\text{phen})](\text{ClO}_4)_2$  **2** at  $50 \text{ mV s}^{-1}$  scan rate in DMF

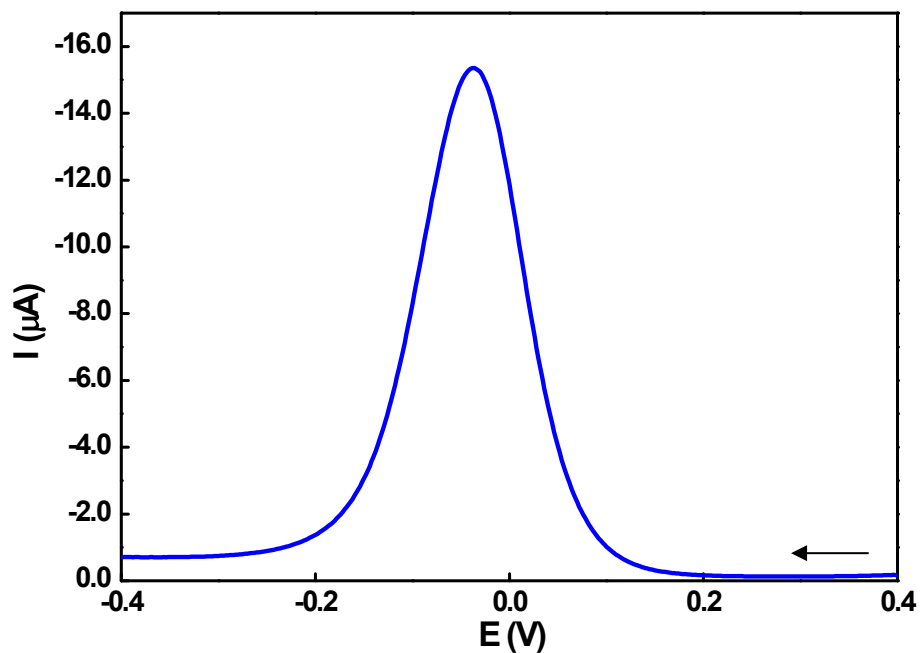

**Fig. S9** Differential pulse voltammogram of  $[\text{Cu}(\text{L1})(\text{phen})](\text{ClO}_4)_2$  **1** at  $2 \text{ mV s}^{-1}$  scan rate in DMF

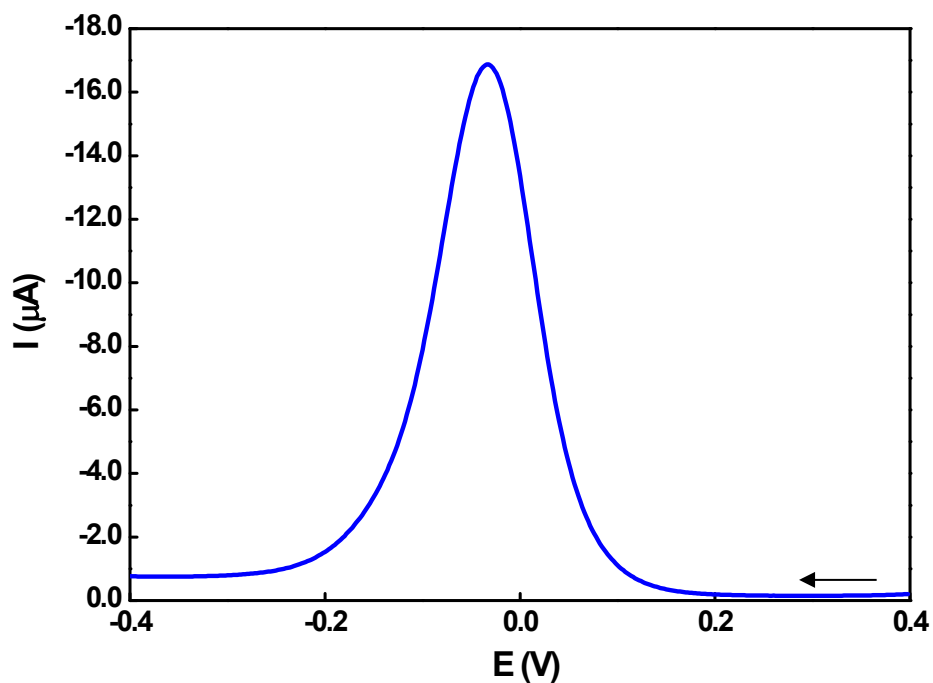

**Fig. S10** Differential pulse voltammogram of  $[\text{Cu}(\text{L2})(\text{phen})](\text{ClO}_4)_2$  **2** at  $2 \text{ mV s}^{-1}$  scan rate in DMF.

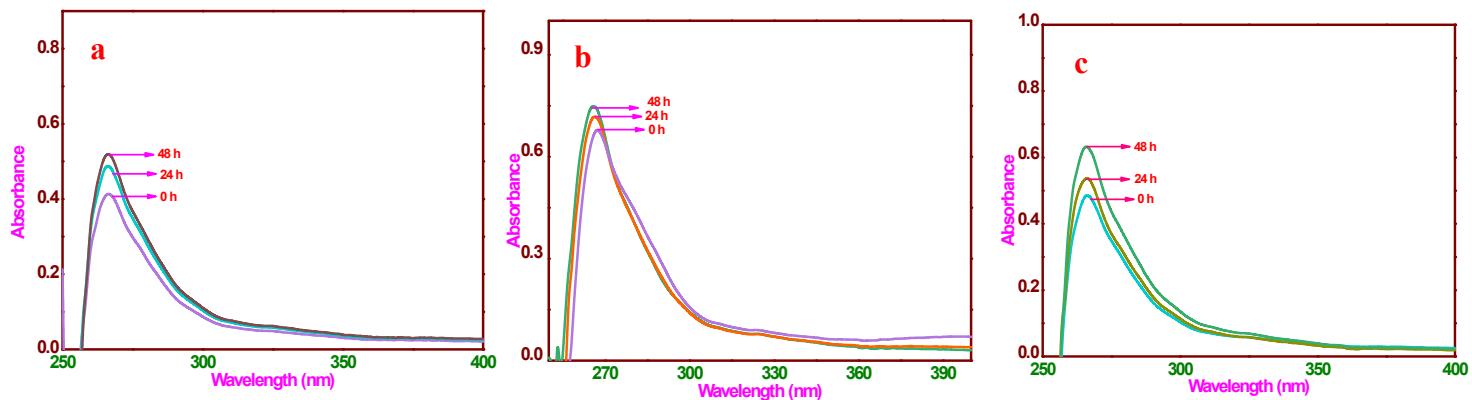

**Fig. S11** Electronic spectrum of **1** in (a) DMSO (b) DMF/5 mM Tris-HCl/50 mM NaCl buffer (pH 7.1) (c) DMEM.

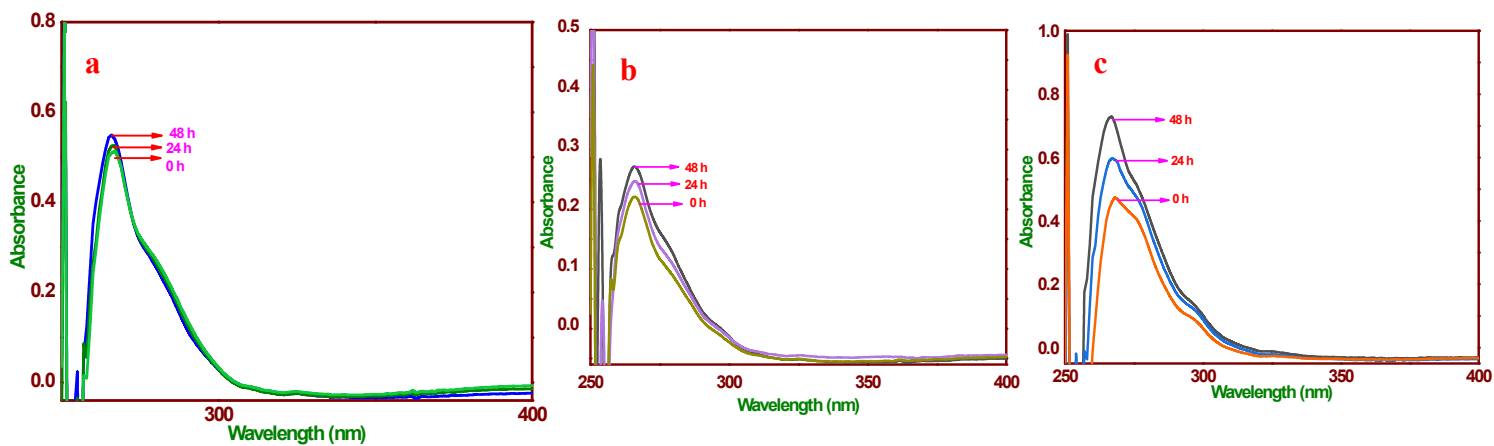

**Fig. S12** Electronic spectrum of **2** in (a) DMSO (b) DMF/5 mM Tris-HCl/50 mM NaCl buffer (pH 7.1) (c) DMEM.

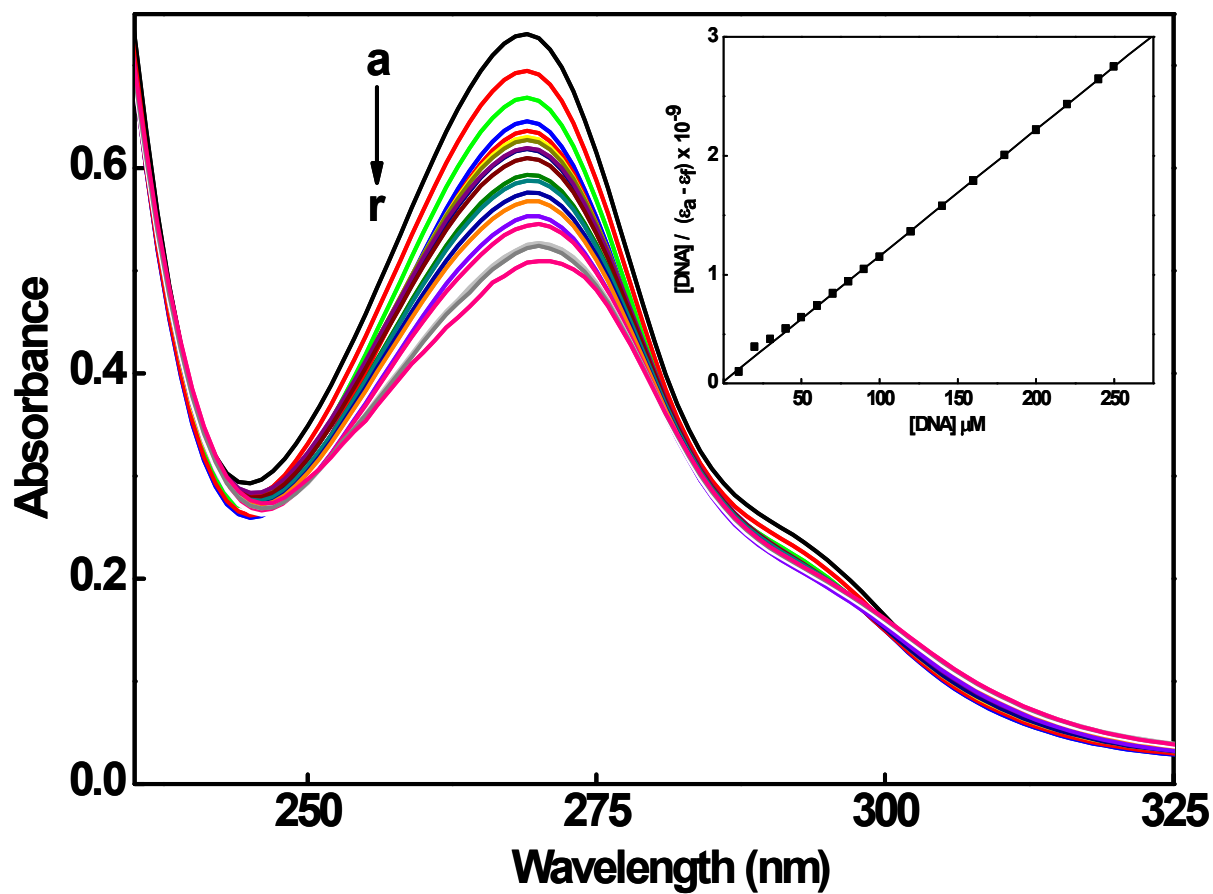

**Fig. S13** Absorption spectra of **2** ( $10 \times 10^{-6}$  M) in 2% DMF/5 mM Tris-HCl/50 mM NaCl buffer at pH 7.1 in the absence ( $R = 0$ ) and presence ( $R = 25$ ) of increasing amounts of CT DNA. Inset: Plot of  $[\text{DNA}]$  vs  $[\text{DNA}]/(\epsilon_a - \epsilon_f)$  at  $R = 25$  of **2**.

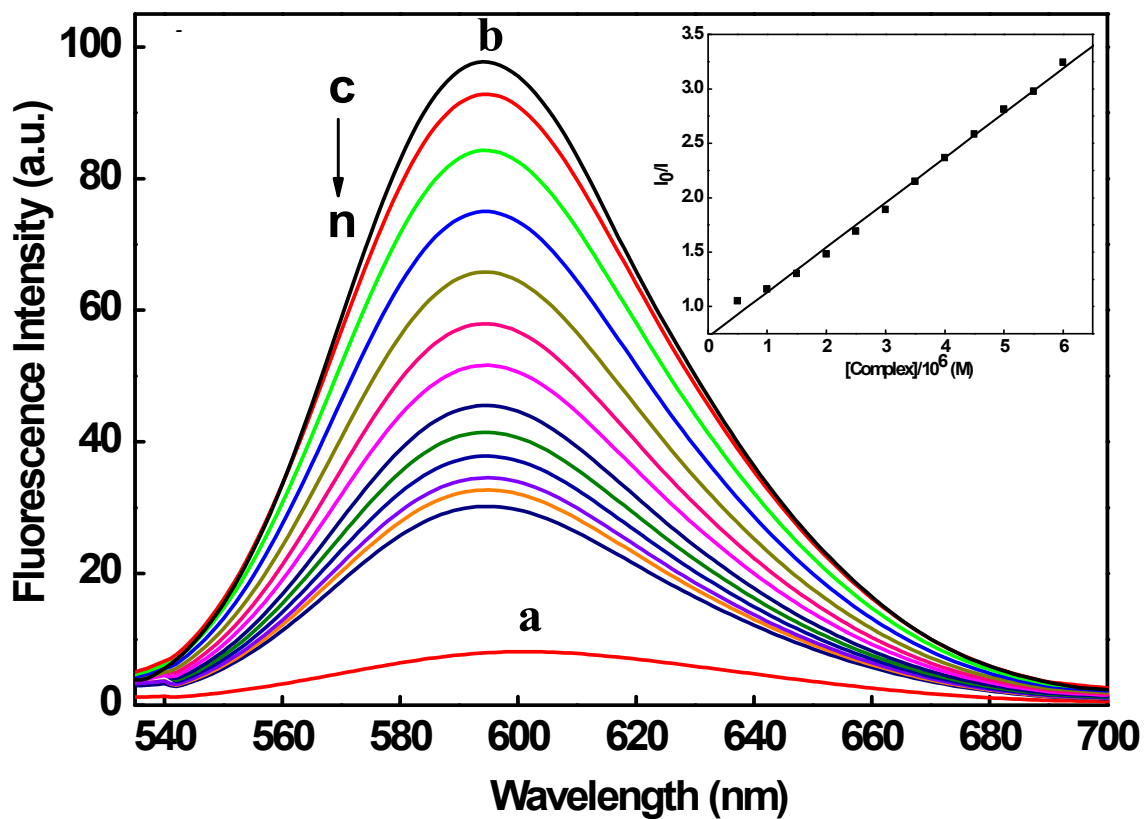

**Fig. S14** Fluorescence quenching curves of ethidium bromide bound to DNA in 2% DMF/5 mM Tris-HCl/50 mM NaCl buffer at pH 7.1: (a) EthBr (1.25  $\mu\text{M}$ ); (b) EthBr + DNA (125  $\mu\text{M}$ ); (c-m) EthBr + DNA + **1** (0-10  $\mu\text{M}$ ). Inset: Plot of  $I_0/I$  versus [complex].

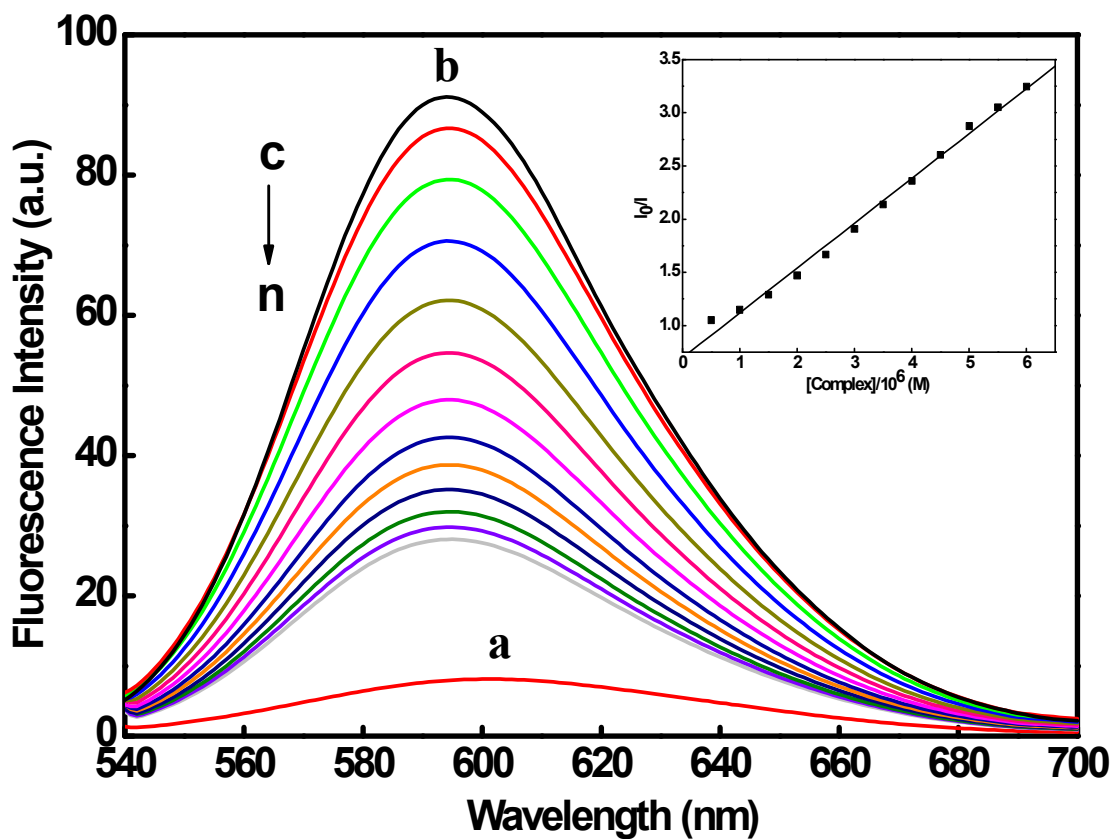

**Fig. S15** Fluorescence quenching curves of ethidium bromide bound to DNA in 2% DMF/5 mM Tris-HCl/50 mM NaCl buffer at pH 7.1: (a) EthBr (1.25  $\mu$ M); (b) EthBr + DNA (125  $\mu$ M); (c-m) EthBr + DNA + **2** (0-10  $\mu$ M). Inset: Plot of  $I_0/I$  versus [complex].

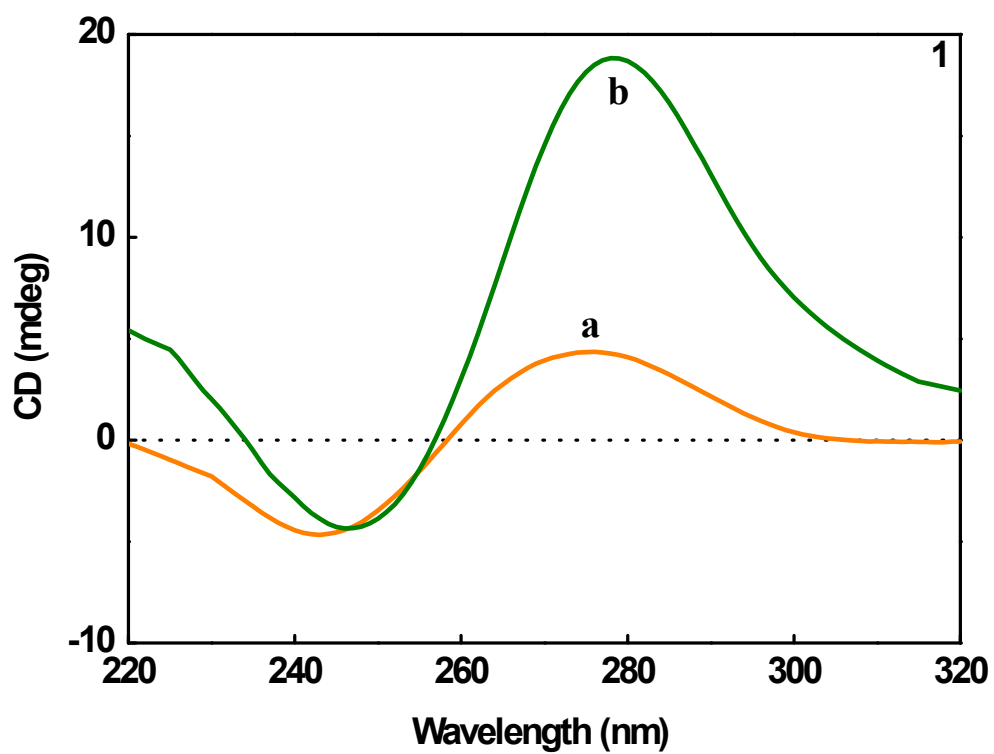

**Fig. S16** Circular dichroism spectra of CT DNA in 2% DMF/5 mM Tris-HCl/50 mM NaCl buffer at pH 7.1 and 25 °C in the absence (a) and presence (b) of **1** at 1/R value of 3.

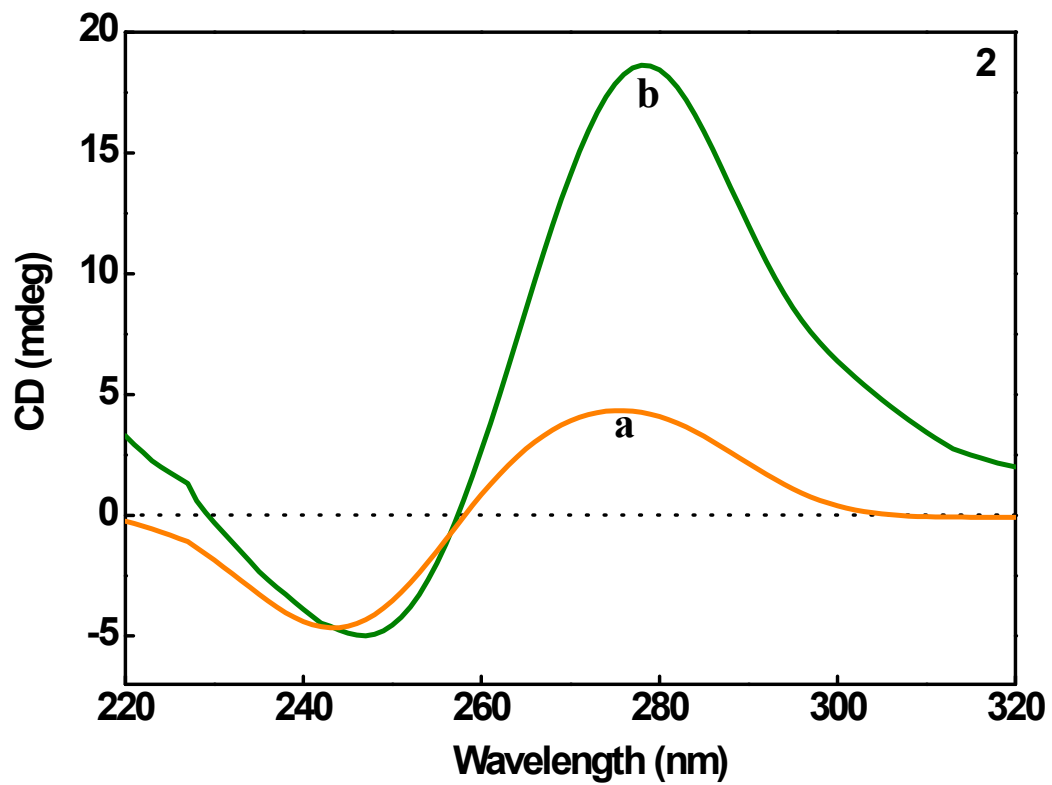

**Fig. S17** Circular dichroism spectra of CT DNA in 2% DMF/5 mM Tris-HCl/50 mM NaCl buffer at pH 7.1 and 25 °C in the absence (a) and presence (b) of **2** at 1/R value of 3.

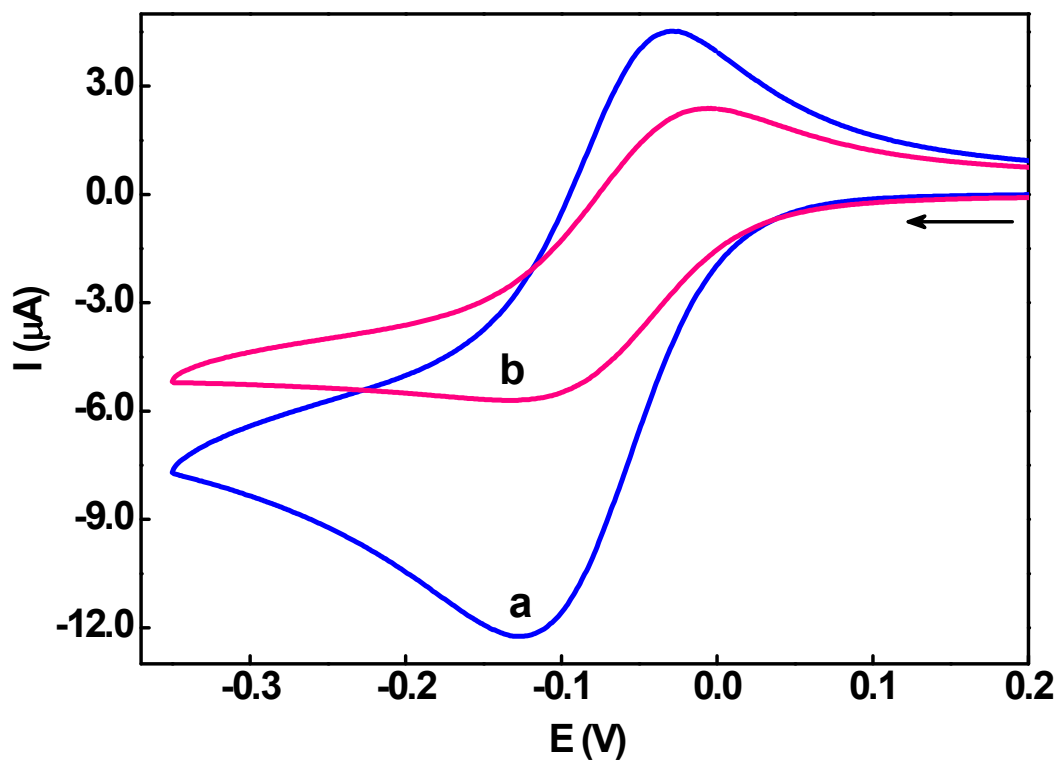

**Fig. S18** Cyclic voltammograms of **1** (0.5 mM) in the absence (a) and presence (b) of CT DNA ( $R = 5$ ) at  $25.0 \pm 0.2$  °C at  $50 \text{ mV s}^{-1}$  scan rate in 2% DMF/5 mM Tris-HCl/50 mM NaCl buffer at pH 7.1.

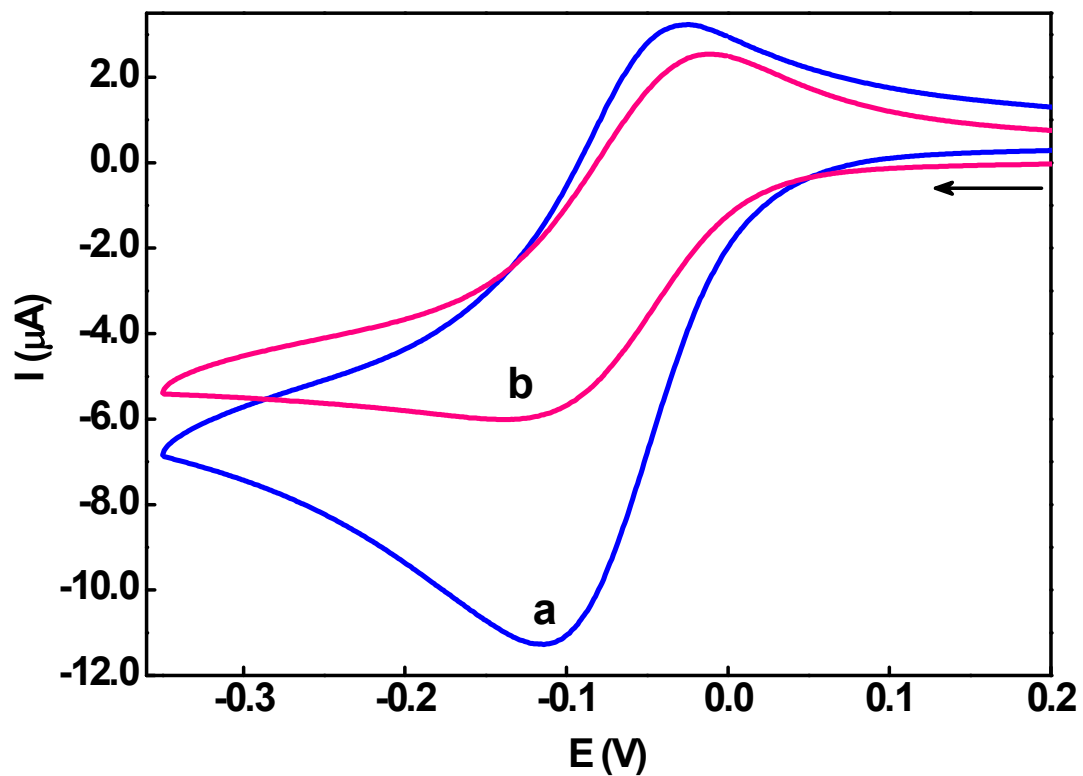

**Fig. S19** Cyclic voltammograms of **2** (0.5 mM) in the absence (a) and presence (b) of CT DNA ( $R = 5$ ) at  $25.0 \pm 0.2$  °C at  $50 \text{ mV s}^{-1}$  scan rate in 2% DMF/5 mM Tris-HCl/50 mM NaCl buffer at pH 7.1.

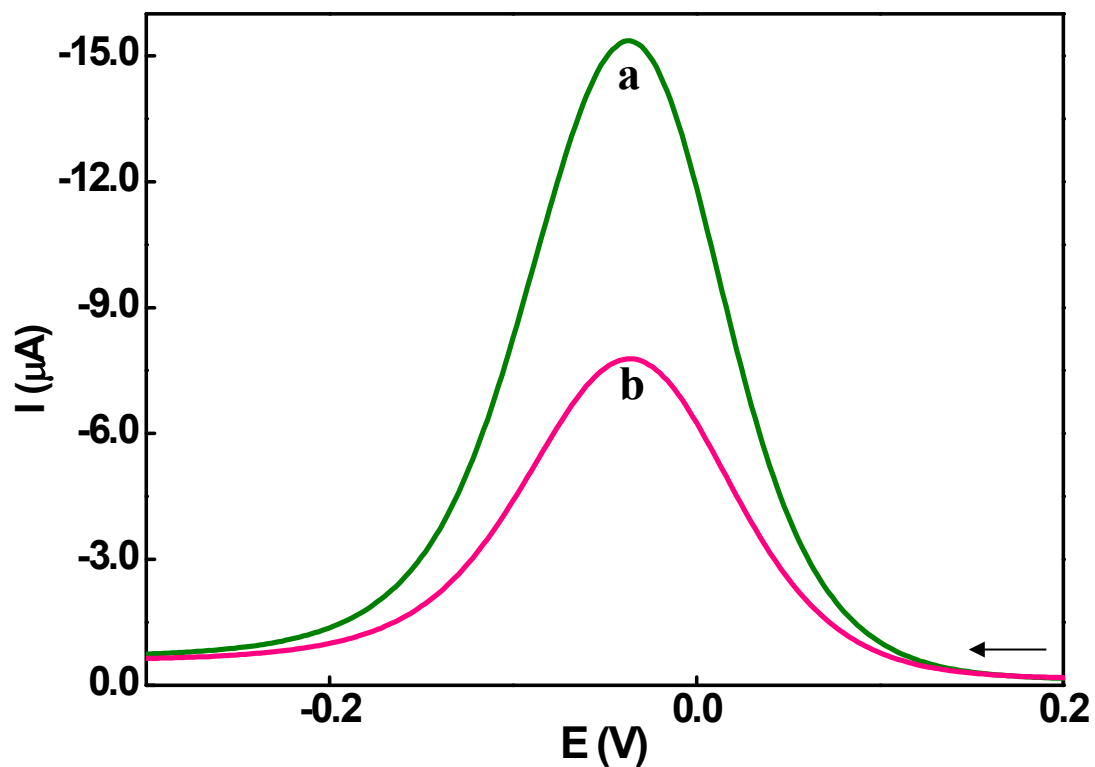

**Fig. S20** Differential pulse voltammograms of **1** (0.5 mM) in the absence (a) and presence (b) of CT DNA ( $R = 5$ ) at  $25.0 \pm 0.2$  °C at  $2 \text{ mV s}^{-1}$  scan rate in 2% DMF/5mM Tris-HCl/50 mM NaCl buffer at pH 7.1.

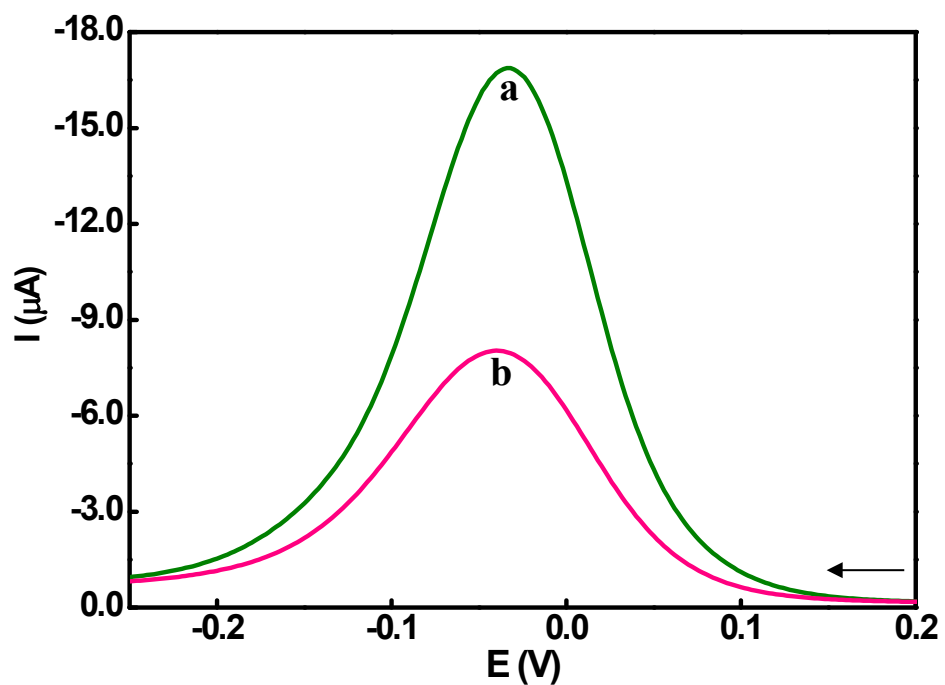

**Fig. S21** Differential pulse voltammograms of **2** (0.5 mM) in the absence (a) and presence (b) of CT DNA ( $R = 5$ ) at  $25.0 \pm 0.2$  °C at  $2 \text{ mV s}^{-1}$  scan rate in 2% DMF/5mM Tris-HCl/50 mM NaCl buffer at pH 7.1.

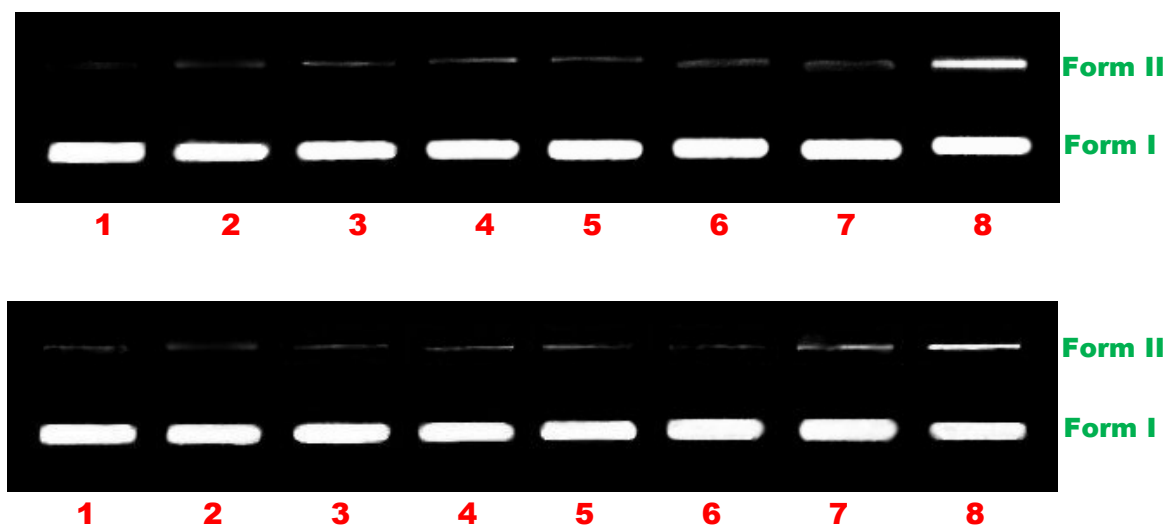

**Fig. S22** Agarose gel showing cleavage of 20  $\mu$ M SC pUC19 DNA incubated with **1** (top) or **2** (bottom) in 2% DMF 50 mM Tris-HCl/NaCl buffer (pH 7.1) at 37  $^{\circ}$ C for 1 h. Lane 1, DNA; lanes 2-8, DNA + **1** (top) or **2** (bottom) (10, 20, 30, 40, 60, 80, 100  $\mu$ M respectively). Forms I and II are supercoiled and nicked circular forms of DNA respectively.

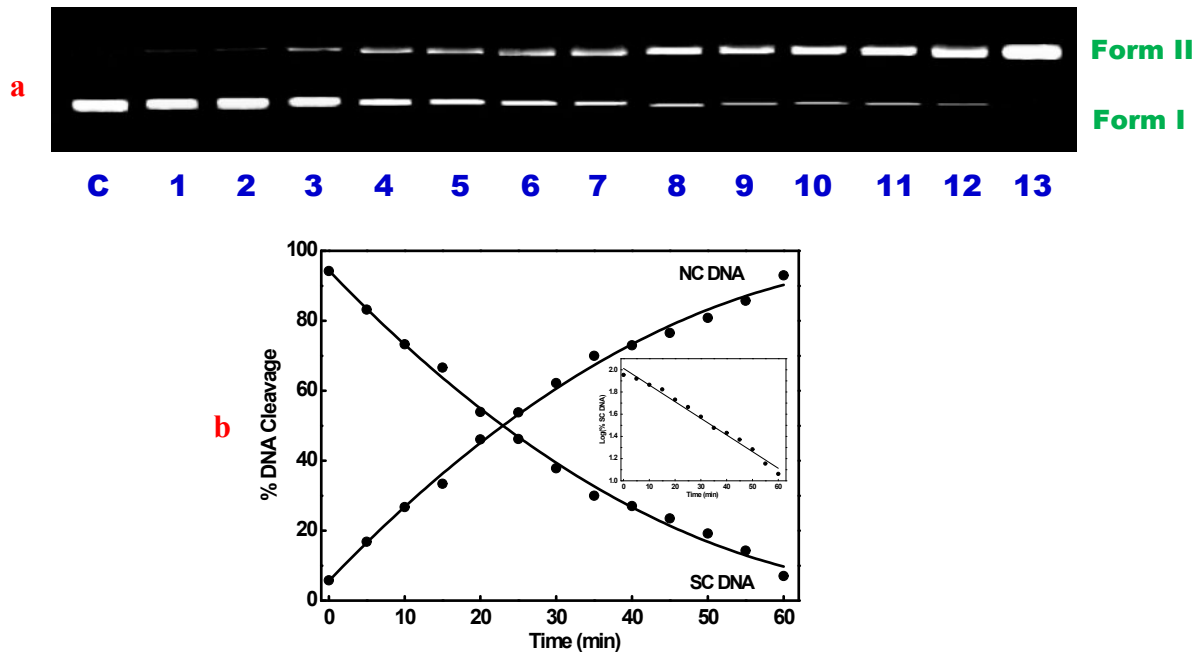

**Fig. S23** (a) Agarose gel showing cleavage of 140  $\mu$ M SC pUC19 DNA incubated with **2** (130  $\mu$ M) in 2% DMF 50mM Tris-HCl/NaCl buffer (pH 7.1) at 37  $^{\circ}$ C for 1 h. Lane C, DNA; lanes 1-13, DNA + **2** (0, 5, 10, 15, 20, 25, 30, 35, 40, 45, 50, 55, 60 h respectively). Forms I and II are supercoiled and nicked circular forms of DNA respectively and (b) disappearance of the supercoiled form (SC DNA) and formation of the nicked circular form. Inset: (% SC DNA) versus time for a **2** (130  $\mu$ M).

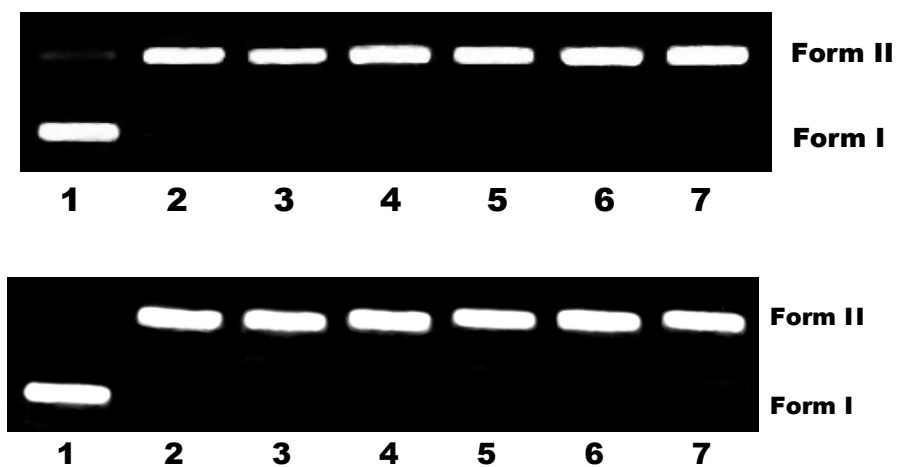

**Fig. S24** Agarose gel showing cleavage of 20  $\mu\text{M}$  SC pUC19 DNA incubated with 30  $\mu\text{M}$  **1** (top) or **2** (bottom) in 2% DMF 50mM Tris-HCl/NaCl buffer (pH 7.1) at 37  $^{\circ}\text{C}$  for 1 h. Lane 1, DNA; Lane 2, : DNA + **1** (top) or **2** (bottom), Lane 3: DNA + **1** (top) or **2** (bottom) +  $\text{NaN}_3$  (100  $\mu\text{M}$ ), Lane 4: DNA + **1** (top) or **2** (bottom) + Methyl Green (100  $\mu\text{M}$ ), Lane 5: DNA + **1** (top) or **2** (bottom) + DMSO (20  $\mu\text{M}$ ), Lane 6: DNA + **1** (top) or **2** (bottom) + SOD (0.5 units), Lane 7: DNA + **1** (top) or **2** (bottom) + Catalase (0.5 units).

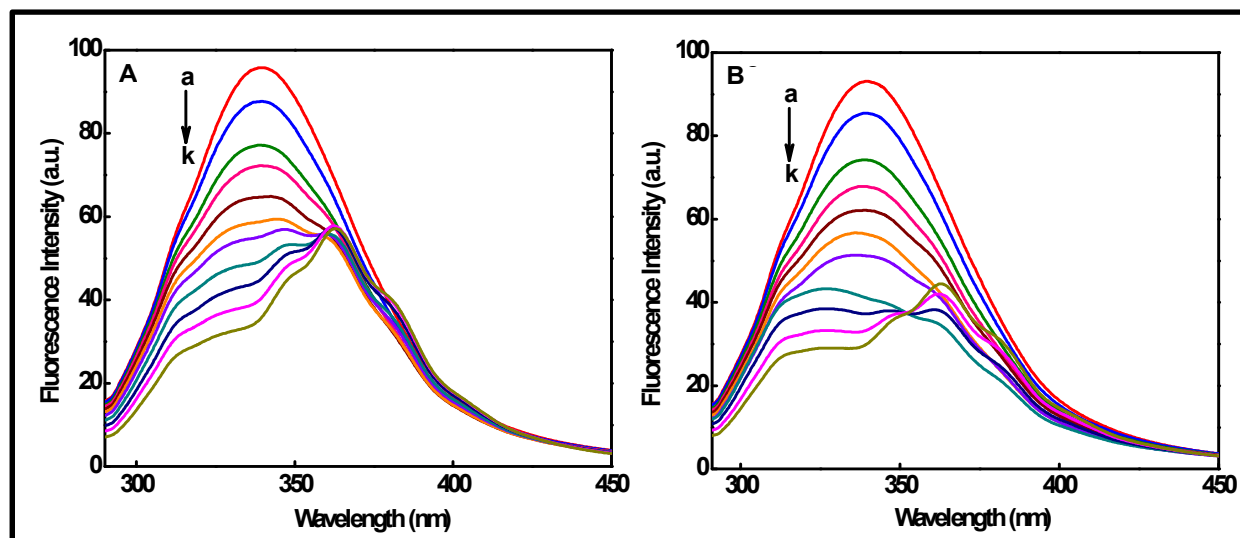

**Fig. S25** Changes in the fluorescence spectra of BSA through the titration with **2** at 300 K (left, **A**) and 310 K (right, **B**). The concentration of BSA is  $1 \times 10^{-6}$  mol L $^{-1}$ , and the concentration of **2** was varied from (a) 0.0 to (k)  $4.0 \times 10^{-6}$  mol L $^{-1}$ ; pH 7.4 and  $\lambda_{\text{ex}}$  280 nm.

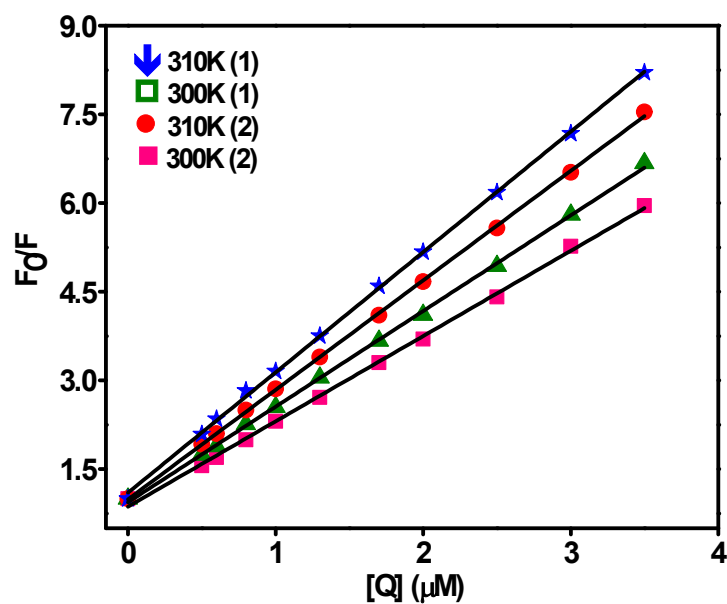

**Fig. S26** The Stern-Volmer plots of BSA at different temperatures for addition of **1** and **2**.  $\lambda_{\text{ex}} = 280$  nm; pH = 7.4.

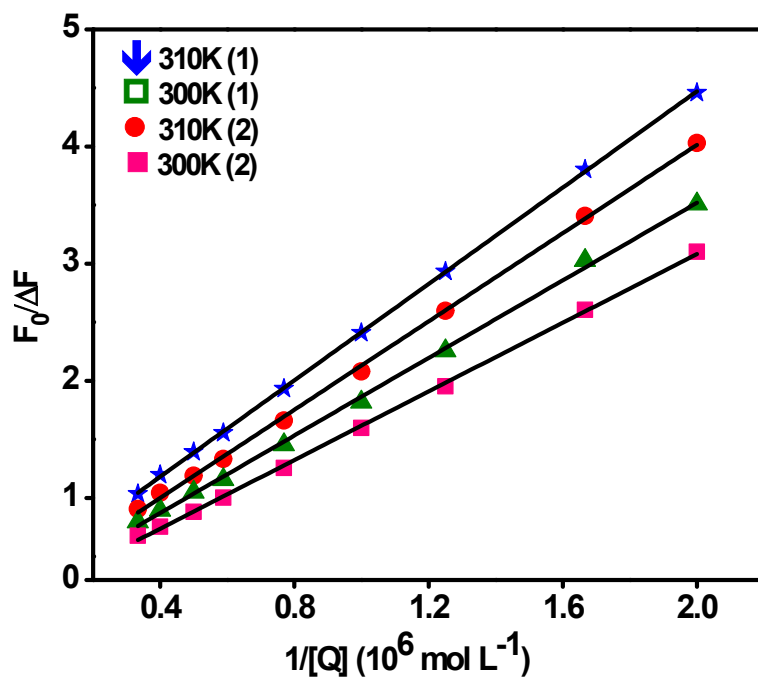

**Fig. S27** The modified Stern-Volmer plots of BSA at different temperatures for addition of **1** and **2**.  $\lambda_{\text{ex}} = 280 \text{ nm}$ ;  $\text{pH} = 7.4$ .

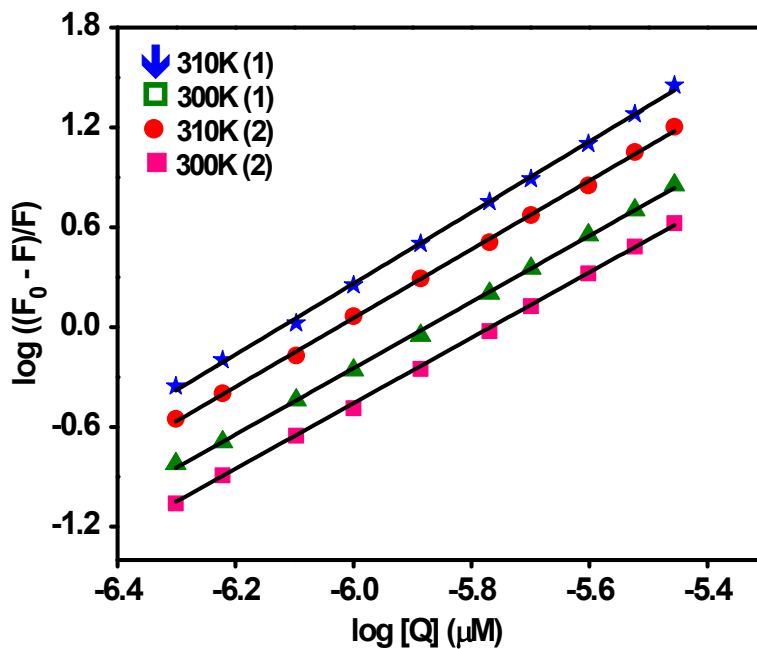

**Fig. S28** Double-log plot of quenching effect of **1** and **2** on BSA fluorescence at  $\text{pH} = 7.4$ .

## DNA binding experiments

Concentrated stock solutions of DNA ( $13.5 \text{ mol dm}^{-3}$ ) were prepared in buffer and sonicated for 25 cycles, where each cycle consisted of 30 s with 1 min intervals. For absorption and emission spectral experiments, the DNA solutions were pretreated with solutions of copper(II) complexes to ensure no change in concentration of the copper(II) complex.

Absorption spectral titration experiments were performed by maintaining a constant concentration of the complex and varying the nucleic acid concentration. This was achieved by dissolving an appropriate amount of the metal complex and DNA stock solutions while maintaining the total volume constant (1 mL). This results in a series of solutions with varying concentrations of DNA, but with a constant concentration of the complex. The absorbance ( $A$ ) of the most red-shifted band of the complex was recorded after successive additions of CT DNA.

Circular dichroic (CD) spectral experiments were done using a cylindrical 0.1 cm path length quartz cell. Each CD spectrum was collected after averaging over at least four accumulations using a scan speed of  $100 \text{ nm min}^{-1}$  and 1 s response time. Machine plus cuvette baselines were subtracted and the resultant spectrum zeroed outside the absorption bands.

For emission intensity measurements, the 2% DMF/50mM Tris-HCl/50 mM NaCl buffer was used as a blank to make preliminary adjustments. The excitation wavelength was fixed and the emission range was adjusted before measurements. DNA was pretreated with ethidium bromide in the ratio  $[\text{NP}]:[\text{EthBr}] = 1:1$  for 30 min at  $27 \text{ }^\circ\text{C}$ . The metal complex was then added to this mixture and their effect on the emission intensity was measured.

Cyclic voltammetry (CV) and differential pulse voltammetry (DPV) were performed in a CHI 620C electrochemical analyzer at  $25 \pm 0.2 \text{ }^\circ\text{C}$ . The working electrode was a glassy carbon disk ( $0.0707 \text{ cm}^2$ ) and the reference electrode, a saturated calomel electrode. A platinum wire was used as the counter electrode. The supporting electrolyte was Tris-HCl/50 mM NaCl buffer (pH 7.1). Solutions were deoxygenated by purging with nitrogen gas for 15 min prior to measurements; during measurements a stream of  $\text{N}_2$  gas was passed over them. The redox potential  $E_{1/2}$  was calculated from the anodic ( $E_{\text{pa}}$ ) and cathodic ( $E_{\text{pc}}$ ) peak potentials of CV traces as  $(E_{\text{pa}} + E_{\text{pc}})/2$  and also from the peak potential ( $E_{\text{p}}$ ) of DPV response as  $E_{\text{p}} + \Delta E/2$  ( $\Delta E$  is the pulse height).

## Protein Binding Experiments

All fluorescence measurements were performed using a 10 mm quartz cuvette at two different temperatures (300 and 310 K). Quantitative analyses of the interaction between complex and BSA were performed by fluorimetric titration (0.05 M phosphate buffer, pH 7.4). A 3.0 mL portion of an aqueous solution of BSA was titrated by successive additions of the complex. Titrations were done manually by using an Eppendorf micro pipette. For every addition, the mixture solution was shaken and allowed to stand for 20 min at the corresponding temperature (300 and 310 K) and then the fluorescence intensities were measured with an excitation wavelength of 280 nm and emission wavelengths in the interval 290-500 nm. The data were corrected using the inner filter effect. The excitation and emission slit width (each 5.0 nm), scan rate (fast) were constantly maintained for all the experiments. The UV-Visible absorption spectra of 1.0  $\mu$ M free BSA as well as BSA/complex (equal molar ratio) in 0.5 M phosphate buffer of pH 7.4 were recorded from 200-500 nm.

**Calculation of BSA Binding Parameters** Fluorescence quenching property can be described by the Stern-Volmer equation:<sup>1</sup>

$$F_0/F = 1 + K_{SV}[Q] = 1 + k_q\tau_0[Q]$$

where  $F_0$  and  $F$  are the steady-state fluorescence intensities in the absence and the presence of quencher, respectively.  $K_{SV}$  is the Stern-Volmer quenching constant and  $[Q]$  is the concentration of quencher. The plot of  $F_0/F$  versus  $[Q]$  shows the value of  $K_{SV}$ . According to the above equation

$$K_{SV} = k_q/\tau_0$$

where  $K_q$  is the quenching rate constant and  $\tau_0$  is the fluorescence lifetime of protein in the absence of quencher, the value of  $\tau_0$  is considered to be  $10^{-8}$  s.<sup>2</sup>

The binding constant ( $K_b$ ) and the numbers of binding sites ( $n$ ) can be determined using the following equation:<sup>3</sup>

$$\log[(F_0-F)/F] = \log K_b + n \log [Q]$$

where  $K_b$  is the binding constant, reflecting the degree of interaction of the BSA and complex, and  $n$  is the number of binding sites. The plots of  $\log[(F_0-F)/F]$  versus  $\log [Q]$  gives a straight line. The values of  $n$  and  $K_b$  can be calculated from the slope and intercept of the linear plot respectively.

The thermodynamic parameters can be calculated from the following Van't Hoff equations<sup>4,5</sup> to elucidate the binding forces between complex and BSA.

$$\ln(K_2/K_1) = (1/T_1 - 1/T_2) \Delta H^\circ/R$$

$$\Delta G^\circ = \Delta H^\circ - T\Delta S^\circ = -RT\ln K$$

where  $K_1$  and  $K_2$  are equilibrium binding constants at temperature  $T_1$  and  $T_2$ , respectively, and  $R$  is the gas constant.

### References

1. J. R. Lakowicz, *Principles of Fluorescence Spectroscopy*, 3rd edn, Springer Science + Business Media, New York, 2006.
2. J. R. Lakowicz and G. Webber, *Biochemistry*, 1973, **12**, 4161–4170.
3. T. Wang, Z. Zhao, B. Wei, L. Zhang and L. Ji, *J. Mol. Struct.*, 2010, **970**, 128–133.
4. J. B. F. Lloyd and I. W. Evett, *Anal. Chem.*, 1977, **49**, 1710–1715.
5. J. Jayabharathi, V. Thanikachalam and M. V. Perumal, *Spectrochim. Acta, Part A*, 2011, **79**, 502-507.
